# Supplementary material for: Canopy Spraying of Abscisic Acid to Improve Fruit Quality of Different Sweet Cherry Cultivars
Source: Preprints.org preprint supplement (doi:10.20944/preprints202109.0046.v1), 2021-09-02
Supplement: Supplementary file 1 [file supplementary]

**Supplementary figures and tables**

**Table S1.** **Phenotypical differences between the cultivars analyzed in this work.** The four cultivars selected differed in the phenotypic characteristic’s ‘color’, ‘blooming time’ and ‘maturity time’.

| Cultivar |  | Color at harvest | Blooming Time | Maturity Time | Reference |
| --- | --- | --- | --- | --- | --- |
| ‘Glenred’ |  | Dark Red | Early-blooming | Early-maturing | <http://www.bradfordgenetics.com/glenred.htm> |
| ‘Lapins’ |  | Mahogany | Early-blooming | Mid-maturing | Rodrigo and Guerra43 |
| ‘Bing’ |  | Mahogany | Mid-blooming | Mid-maturing | Rodrigo and Guerra43 |
| ‘Royal Rainier’ |  | Bicolor | Early-blooming | Mid-maturing | Rodrigo and Guerra43 |

**Table S2.** **Important dates associated to phenology of bloom and color of the fruits during season 2017.** The phenology was estimated considering the state of the whole tree using the four replicates. DAFB: days after full bloom.

| Cultivar | Phenology | Date | DAFB |
| --- | --- | --- | --- |
| ‘Glenred’ | Full bloom | September 11th, 2017 | 0 |
| 10%-15% Pink blush | October 23rd, 2017 | 43 |
| Harvest | November 9th, 2017 | 59 |
| ‘Lapins’ | Full bloom | September 21st, 2017 | 0 |
| 10% Pink blush | November 16th, 2017 | 56 |
| Harvest | November 29th, 2017 | 69 |
| ‘Bing’ | Full bloom | September 21st, 2017 | 0 |
| 20% Pink blush | November 17th, 2017 | 57 |
| Harvest | November 30th, 2017 | 70 |
| ‘Royal Rainier’ | Full bloom | September 14th, 2017 | 0 |
| 10% Pink blush | October 30th, 2017 | 46 |
| Harvest | November 23rd, 2017 | 70 |

**Table S3. Important dates associated to phenology of bloom and color of the fruits during season 2018.** The phenology was estimated considering the state of the whole tree using the four replicates. DAFB: days after full bloom. DAFB: days after full bloom.

| Cultivar | Treatment | Phenology | Date | DAFB |
| --- | --- | --- | --- | --- |
| ‘Glenred’ | ABA (canopy spraying) | Full bloom | September 12th, 2018 | 0 |
| 15% Pink blush | October 23rd, 2018 | 41 |
| Harvest | November 9th, 2018 | 58 |
| NDGA (canopy spraying) | Full bloom | September 10th, 2018 | 0 |
| 10% - 15% Pink blush | October 23rd, 2018 | 43 |
| Harvest | November 9th, 2018 | 60 |
| ‘Lapins’ | ABA (canopy spraying) | Full bloom | September 17th, 2018 | 0 |
| 25% Pink blush | November 14th, 2018 | 58 |
| Harvest | November 30th, 2018 | 74 |
| NDGA (canopy spraying) | Full bloom | September 18th, 2018 | 0 |
| 20% - 25% Pink blush | November 14th, 2018 | 57 |
| Harvest | November 30th, 2018 | 73 |
| ‘Lapins’ | ABA ("on tree" dipping) | Full bloom | September 17th, 2018 | 0 |
| 25% Pink blush | November 14th, 2018 | 58 |
| Harvest | November 30th, 2018 | 74 |

**Table S4. Important dates associated to phenology of bloom and color of the fruits during season 2019.** The phenology was estimated considering the state of the whole tree using the four replicates. DAFB: days after full bloom. DAFB: days after full bloom.

| Cultivar | Treatment | Phenology | Date | DAFB |
| --- | --- | --- | --- | --- |
| ‘Lapins’ | ABA ("on tree" dipping) | Full bloom | September 12th, 2019 | 0 |
| 25% - 35% Pink blush | November 4th, 2019 | 53 |
| Harvest | November 27th, 2019 | 76 |
